# Supplementary material for: All-thiophene dendrimers based on cyclooctatetrathiophene: synthesis and aggregation-induced emission (AIE) features
Source: Royal Society of Chemistry journal article supplement (doi:10.1039/d4qo01525h), 2024-01-01
Supplement: d4qo01525h1.pdf [file d4qo01525h1.pdf]

*Supporting Information*

**All-thiophene Dendrimers Based on Cyclooctatetrathiophene :  
Synthesis and Aggregation-induced Emission (AIE) Features**

Pengfei Wang <sup>1,†</sup>, Chunmei Zhao <sup>1,†</sup>, Shuai Qiu <sup>1</sup>, Wan Xu <sup>1,\*</sup>, Chunli Li <sup>1</sup>, Zhiying Ma <sup>1</sup>, Wei Cao <sup>1</sup>, Li Xu <sup>2</sup> and Hua Wang <sup>1,\*</sup>

<sup>1</sup> Institute of Nanoscience and Engineering, Henan University, Kaifeng 475004, China

<sup>2</sup> College of Chemistry and Molecular Sciences, Henan University, Kaifeng 475004, China

E-mail: 40070005@henu.edu.cn; hwang@henu.edu.cn

**Table of contents**

|                                                                                              |     |
|----------------------------------------------------------------------------------------------|-----|
| 1. Experimental section .....                                                                | S2  |
| General procedures and materials. ....                                                       | S2  |
| Synthesis of <b>COTh-4Br</b> . ....                                                          | S3  |
| Synthesis of <b>COTh</b> . ....                                                              | S3  |
| Synthesis of <b>COTh-3Br</b> from <b>COTh-4Br</b> . ....                                     | S3  |
| Synthesis of <b>COTh-3Br</b> from <b>COTh</b> . ....                                         | S4  |
| Synthesis of <b>COTh-3TMS</b> from <b>COTh</b> . ....                                        | S4  |
| Synthesis of <b>COTh-B3TMS</b> . ....                                                        | S4  |
| Synthesis of <b>2COTh</b> .....                                                              | S5  |
| Synthesis of <b>4COTh</b> via Negishi coupling. ....                                         | S6  |
| Synthesis of <b>4COTh</b> via Suzuki coupling. ....                                          | S6  |
| Synthesis of <b>5COTh</b> . ....                                                             | S7  |
| Synthesis of <b>8COTh</b> . ....                                                             | S7  |
| 2. NMR and HRMS spectra.....                                                                 | S8  |
| NMR and HRMS spectra of <b>COTh-3Br</b> .....                                                | S8  |
| NMR and HRMS spectra of <b>COTh-B3TMS</b> .....                                              | S9  |
| NMR and HRMS spectra of <b>2COTh</b> .....                                                   | S10 |
| NMR and HRMS spectra of <b>4COTh</b> . ....                                                  | S11 |
| NMR and HRMS spectra of <b>8COTh</b> . ....                                                  | S12 |
| 3. Theoretical calculation .....                                                             | S14 |
| 4. Fluorescence spectra of <b>2COTh</b> , <b>4COTh</b> , <b>5COTh</b> and <b>8COTh</b> ..... | S15 |
| 5. References. ....                                                                          | S15 |

## 1. Experimental Section

**General Procedures and Materials:** Ether and tetrahydrofuran (THF) for use were freshly distilled from sodium/benzophenone prior to use. Concentration of *n*-BuLi (hexane) was determined by titration with *N*-pivaloyl-*o*-toluidine<sup>1</sup>. Column chromatography was carried out on silica gel (300-400 or 200-300 mesh). Analytical thin-layer chromatography was performed on glass plates of Silica Gel GF-254 with detection by UV. Standard techniques for synthesis under inert atmosphere, using gasbag and Schlenk glassware equipped with an 8-mm PTFE vacuum stop-cock were employed. All starting materials and reagents were commercially available. NMR spectra were obtained using chloroform-*d* (CDCl<sub>3</sub>) as solvent. The chemical shift references were as follows: (<sup>1</sup>H) CDCl<sub>3</sub>, 7.26 ppm (CHCl<sub>3</sub>); (<sup>13</sup>C) CDCl<sub>3</sub>, 77.00 ppm (CDCl<sub>3</sub>). IR spectra were obtained using an FT-IR instrument, equipped with an ATR sampling accessory. HRMS spectra were carried out at TOF MS (EI<sup>+</sup>) or FTMS (ESI). Melting point determination was taken on a Melt-Temp apparatus and was uncorrected. UV-vis spectra were obtained with a double-beam spectrophotometer at room temperature. PL spectra were recorded on HORIBA JY FluoroLog-3 or FLS980 at room temperature. Field-emission scanning electron microscopy (FESEM) images were acquired with a JSM-7610F electron microscope operating at 5 kV. Solvents for UV-vis and emission spectroscopic measurements were spectrographically pure as received. The ground and excited states were optimized using density functional theory and time-dependent density functional theory. The solution phase in tetrahydrofuran (THF) was modeled by the polarizable continuum model (PCM)<sup>2</sup> as implemented in Gaussian 09 package<sup>3</sup>. The aggregation state was modeled using a quantum mechanics and molecular mechanics (QM/MM) approach. The QM/MM calculations were carried out using the ChemShell 3.5 package<sup>4</sup> integrating Turbomole 7.0<sup>5,6</sup> (QM part) with DL-POLY<sup>7</sup> (MM part) programs. The quantum calculations were carried out using B3LYP method with 6-31G\* (for solution state) or def2-SV(P) (for solid state) basis sets. For the MM treatment, the general Amber force field (GAFF)<sup>8</sup> was used. The model of

aggregation phase was set up on the basis of the X-ray crystal structure, which consists of one central molecule for the QM part and 71 surrounding molecules (5472 atoms) for the MM part. The reorganization energies were obtained by the MOMAP program<sup>9-11</sup>. The molecular geometries were optimized at the B3LYP/6-31G(d) level of theory. Subsequently, we performed TD-DFT calculations to simulate the UV-vis spectra of these compounds at BMK/6-31G(d) level of theory. The primary  $\pi$ -electron delocalization channels were obtained by the Multiwfn<sup>12</sup> and VMD program<sup>13</sup>, as determined by the localized orbital locator (LOL)<sup>14,15</sup>.

#### *Synthesis of COTh-4Br*<sup>16</sup>

**COTh-(TMS)<sub>4</sub>** (2.74 g, 4.44 mmol) was dissolved in 40 mL HOAc/CHCl<sub>3</sub> (v/v = 1:1), NBS (3.56 g, 20.00 mmol, 4.5 equiv) was added under good stirring at room temperature. The reaction process was monitored by TLC analysis. Four hours later, the reaction mixture was quenched with saturated NaHCO<sub>3</sub> aqueous. After being extracted with CHCl<sub>3</sub>, the combined organic phase was washed with saturated NaHCO<sub>3</sub> aqueous and water orderly. Drying over anhydrous MgSO<sub>4</sub> was sequenced by solvent evaporation to give crude product. Pure **COTh-4Br** (2.60 g) was obtained by recrystallization from CHCl<sub>3</sub>/CH<sub>3</sub>OH in 90% yield. M.p. > 300 °C.

#### *Synthesis of COTh*<sup>16</sup>

To a solution of **COTh-(TMS)<sub>4</sub>** (105.8 mg, 0.17 mmol) in CHCl<sub>3</sub> (5 mL), TFA (0.3 mL, 10 equiv) was added at room temperature with stirring. The reaction process was monitored by TLC analysis. After stirring at room temperature for 4 h, the reaction mixture was quenched with saturated NaHCO<sub>3</sub> and extracted with CHCl<sub>3</sub>, then washed with saturated NaHCO<sub>3</sub> and water. The organic layer was dried over anhydrous MgSO<sub>4</sub>. After removing the solvent in vacuo, the residue was purified by column chromatography with petrol ether (60–90 °C) as eluent to yield **COTh** (53.0 mg, 94 %) as a white solid.

#### *Synthesis of COTh-3Br from COTh-4Br*

*n*-BuLi (0.46 M in hexane, 0.46 mL, 0.21 mmol, 1.2 equiv) was added dropwise to a solution of **COTh-4Br** (113.0 mg, 0.18 mmol) in dry THF (250 mL) at  $-78$  °C. The reaction process was monitored by TLC analysis. After stirring at  $-78$  °C for 4 h, methanol was used to quench the reaction, and the reaction mixture was extracted with  $\text{CHCl}_3$ . The resulting organic layer was washed with water and then dried over  $\text{MgSO}_4$ . The solvent was removed in vacuo to give crude product. A white powder **COTh-3Br** (58.3 mg, 69%) was obtained by column chromatography with petrol ether ( $60$ – $90$  °C) as eluent. M.p.:  $265$ – $268$  °C.  $^1\text{H}$  NMR (400 MHz,  $\text{CDCl}_3$ ):  $\delta$  7.41 (d,  $J = 5.2$  Hz, 1H), 6.93 (s, 1H), 6.91 (d,  $J = 5.2$  Hz, 1H), 6.90 (s, 1H), 6.89 (s, 1H);  $^{13}\text{C}$  NMR (100 MHz,  $\text{CDCl}_3$ ):  $\delta$  137.19, 136.29, 135.70, 135.69, 133.73, 132.67, 132.38, 132.12, 131.90, 131.44, 129.57, 128.13, 114.69, 114.62, 114.39; HRMS (MALDI/DHB)  $m/z$  calcd for  $[\text{C}_{16}\text{H}_5\text{Br}_3\text{S}_4]$  561.6824, found 561.6818. IR (KBr): 3106, 3083, 2922, 2852, 831, 733 (C–H)  $\text{cm}^{-1}$ .

#### *Synthesis of COTh-3Br from COTh*

*n*-BuLi (2.40 M in hexane, 0.48 mL, 1.16 mmol, 3.5 equiv) was added dropwise to a solution of **COTh** (108.9 mg, 0.33 mmol) in dry THF (100 mL) at  $-78$  °C. After keeping at  $-78$  °C for 4 h, then solution of  $\text{C}_2\text{Br}_2\text{Cl}_4$  (0.54 g, 1.66 mmol, 3.5 equiv) in THF was added dropwise. The reaction was warmed slowly to ambient temperature overnight. The reaction mixture was quenched with water at room temperature, extracted with  $\text{CHCl}_3$ . The organic layer was washed with water and then dried over  $\text{MgSO}_4$ . The light yellow solid **2** (67.0 mg, 36%) was obtained by column chromatography with petrol ether ( $60$ – $90$  °C) as eluent. M.p.  $>300$  °C.

#### *Synthesis of COTh-3TMS from COTh*

To a solution of **COTh** (401.8 mg, 1.22 mmol) in dry THF (100 mL), *n*-BuLi (2.28 M in hexane, 2.04 mL, 4.65 mmol, 3.5 equiv) was added dropwise at  $-78$  °C. After keeping at  $-78$  °C for 4 h, the reaction mixture was quenched with trimethylchlorosilane (0.62 mL, 4.89 mmol, 4.0 equiv), then warmed slowly to ambient temperature and stirred overnight. The resulted mixture was quenched with water and extracted with  $\text{CHCl}_3$ . The

organic layer was washed with water and then dried over MgSO<sub>4</sub>. The light yellow solid **COTh-3TMS** (360.0 mg, 54%) was obtained by column chromatography with petrol ether (60–90 °C) as eluent. M.p.: 115–116 °C.

#### *Synthesis of COTh-B3TMS*

To the solution of **COTh-3TMS** (483.4 mg, 0.89 mmol) in dry ether (35 mL), *n*-BuLi (2.33 M, 0.46 mL, 1.2 equiv) was added dropwise at 0 °C. After stirring for 2 h, the solution of bis(pinacolato)diboron (292.8 mg, 1.3 equiv) in dry Et<sub>2</sub>O (5 mL) was added to the reaction mixture at –78 °C. Then warmed slowly and stirred overnight. Quenching with water was sequenced by extraction with ether (3×10 mL), then washed with water (3×50 mL). After being dried over dried over MgSO<sub>4</sub>, the solvent was removed to give crude product. **COTh-B3TMS** (510.0 mg) with white solid was obtained by column chromatography with petrol ether (60–90 °C) as eluent in 86% yield. M.p. > 300 °C. <sup>1</sup>H NMR (400 MHz, CDCl<sub>3</sub>): δ 7.48 (s, 1H), 7.08 (s, 1H), 7.07(s, 1H), 7.05 (s, 1H), 1.34 (s, 6H), 1.32 (s, 6H), 0.32 (s, 9H), 0.31 (s, 9H), 0.30 (s, 9H). <sup>13</sup>C NMR (100 MHz, CDCl<sub>3</sub>): 142.85, 142.44, 142.42, 139.75, 139.61, 137.76, 137.70, 137.46, 137.41, 137.31, 137.05, 136.96, 136.92, 136.74, 136.66, 84.22, 24.85, 24.56, –0.18, –0.20, –0.21. HRMS (TOF MS ES<sup>+</sup>) *m/z* calcd for [C<sub>31</sub>H<sub>43</sub>BO<sub>2</sub>S<sub>8</sub>Si<sub>3</sub>] 670.1547, found [M+1]<sup>+</sup> 671.1629. IR(KBr): 3053, 2977, 2956, 2897 (C–H) cm<sup>–1</sup>.

#### *Synthesis of 2COTh*

*n*-BuLi (2.53 M in hexane, 0.14 mL, 0.36 mmol, 1.2 equiv) was added dropwise to a solution of **COTh-3TMS** (162.6 mg, 0.30 mmol) in dry THF (25 mL) at –78 °C. After keeping at –78 °C for 2 h, dry CuCl<sub>2</sub> (80.2 mg, 0.60 mmol, 2.0 equiv) was added quickly. The reaction mixture was kept at –78 °C for 2 h, then warmed up slowly to ambient temperature. The reaction mixture was quenched with water, and extracted with CHCl<sub>3</sub>. The organic layer was washed with water and then dried over MgSO<sub>4</sub>. The solvent was removed by rotary evaporation to give crude product. A light yellow solid **2COTh** (72.0 mg, 44.4%) was obtained by column chromatography on silica gel with petrol ether

(60–90 °C) as eluent. M.p. > 300 °C. <sup>1</sup>H NMR (300 MHz, CDCl<sub>3</sub>): δ 7.08 (s, 2H), 7.07 (s, 2H), 7.06 (s, 2H), 7.02 (s, 2H), 0.36–0.30 (m, 54H). <sup>13</sup>C NMR (75 MHz, CDCl<sub>3</sub>): 142.99, 142.92, 142.86, 138.31, 138.27, 137.88, 137.70, 137.42, 137.22, 137.11, 137.07, 137.04, 136.97, 136.9, 136.90, 136.82, 126.97, 0.97, 0.05. HRMS (DART Postive) *m/z* calcd for [C<sub>50</sub>H<sub>62</sub>S<sub>8</sub>Si<sub>6</sub>] 1086.1233, found 1087.1288. IR(KBr): 2957, 2925, 2898, 2853 (C–H) cm<sup>-1</sup>.

#### *Synthesis of 4COTH via Negishi coupling*

*n*-BuLi (2.28 M in hexane, 0.33 mL, 0.75 mmol, 1.02 equiv) was slowly added to a solution of **COTH-3TMS** (0.40 g, 0.73 mmol, 1.0 equiv) in dry THF (20 mL) in a Schlenk vessel at –78 °C. 2 h later, the resulted pale yellow mixture was treated with ZnCl<sub>2</sub> (0.151 g, 1.10 mmol, 1.5 equiv), and stirred for 30 min. Then warmed to room temperature and kept for 2 h. **COTH-3Br** (103.8 mg, 0.18 mmol, 0.25 equiv) and Pd(PPh<sub>3</sub>)<sub>4</sub> (51.0 mg, 0.04 mmol, 0.06 equiv) were added to the reaction mixture under argon. The reaction mixture was refluxed for 3 days at 110 °C. After being quenched with water, the reaction mixture was extracted with CHCl<sub>3</sub> and dried over MgSO<sub>4</sub>. The solvent was removed in vacuo to provide crude product. It was purified by silica chromatography with petrol ether (60–90 °C) as eluent to give **4COTH** (180.0 mg, 50%) as a yellow solid. M.p. > 300 °C. <sup>1</sup>H NMR (400 MHz, CDCl<sub>3</sub>): δ 7.42 (d, *J* = 4.0 Hz, 1H), 7.08–6.97 (m, broad peaks, 16H), 0.35–0.32 (m, 81H); <sup>13</sup>C NMR (100 MHz, CDCl<sub>3</sub>): δ 143.23, 143.20, 143.19, 143.14, 143.12, 143.11, 143.04, 138.68, 138.65, 138.63, 138.59, 138.55, 138.49, 137.83, 137.75, 137.71, 137.67, 137.66, 137.52, 137.45, 137.43, 137.37, 137.25, 137.17, 137.16, 137.12, 137.05, 136.98, 136.93, 136.71, 136.67, 136.63, 136.59, 132.45, 132.31, 132.28, 132.22, 132.11, 132.09, 132.05, 131.81, 131.60, 131.55, 131.33, 131.28, 131.08, 130.87, 130.42, 130.37, 127.96, 127.75, 127.24, 127.20, 127.11, 127.06, 127.01, 126.81, 126.77, 126.68, 126.62, 126.59, 0.17; HRMS (MALDI/DHB) *m/z* calcd for [C<sub>91</sub>H<sub>98</sub>S<sub>16</sub>Si<sub>9</sub>] 1954.1123, found 1954.1121. IR(KBr): 3058, 2955, 2897, 2853(C–H) cm<sup>-1</sup>.

### *Synthesis of 4COTh via Suzuki coupling*

**COTh-3Br** (42.4 mg, 0.08 mmol 1.0 equiv), **COTh-B3TMS** (226.5 mg, 0.34 mmol, 4.5 equiv),  $K_2CO_3$  (77.6 mg, 0.56 mmol, 7.5 equiv) and  $Pd(PPh_3)_4$  (21.7 mg, 18.76  $\mu$ mol, 0.25 equiv) were mixed with 15 mL THF and 2 mL water under argon. The mixture was stirred at 80 °C for 15 h. After being quenched with water, the reaction mixture was extracted with  $CHCl_3$ , and dried over anhydrous  $MgSO_4$ . After the solvent was removed in vacuo, the residue was purified by column chromatography on silica gel with petroleum ether (60–90 °C) as eluent to yield **4COTh** (54.0 mg, 37%) as a yellow solid. M.p. > 300 °C.

### *Synthesis of 5COTh<sup>16</sup>*

*n*-BuLi (2.50 M in hexane, 0.17 mL, 0.43 mmol, 1.02 equiv) was slowly added to a solution of **COTh-B3TMS** (240.0 mg, 0.44 mmol, 1.0 equiv) in dry THF (20 mL) at –78 °C. After stirring for 2 h, the pale yellow reaction mixture was treated with  $ZnCl_2$  (90.0 mg, 0.66 mmol, 1.5 equiv), kept stirring at for 30 min, then warmed to room temperature and kept for 2 h. **COTh-4Br** (56.7 mg, 0.09 mmol, 0.2 equiv) and  $Pd(PPh_3)_4$  (30.5 mg, 0.03 mmol, 0.06 equiv) were added to the reaction mixture under argon. Finally, The reaction mixture was refluxed for 2 days at 110 °C. After quenching with water, the reaction mixture was extracted with  $CHCl_3$  and dried over  $MgSO_4$ . The product was purified by silica chromatography with petrol ether (60–90 °C) as eluent. **5COTh** (47.0 mg, 21.0%) was obtained as a yellow solid. M.p. > 300 °C.

### *Synthesis of 8COTh*

*n*-BuLi (0.36 M in hexane, 0.22 mL, 0.08 mmol, 2.0 equiv) was added dropwise to a solution of **4COTh** (78.3 mg, 0.04 mmol) in dry THF (20 mL) at –78 °C. 2 h later, dry  $CuCl_2$  (0.0161 g, 0.12 mmol, 3.0 equiv) was added quickly. The reaction mixture was stirred at –78 °C for 2 h, –55 °C for 2 h, and then warmed slowly to ambient temperature. The reaction mixture was quenched with water, extracted with  $CHCl_3$ . The organic layer was washed with water and then dried over  $MgSO_4$ . The yellow solid

**8COTh** (21.0 mg, 27%) was obtained by column chromatography on silica gel with petrol ether (60–90 °C) as eluent. M.p. > 300 °C.  $^1\text{H}$  NMR (400 MHz,  $\text{CDCl}_3$ ):  $\delta$  7.22 (s, broad, 2H) 7.13–6.99 (m, broad, 30H), 0.39–0.26 (m, 162H);  $^{13}\text{C}$  NMR (100 MHz,  $\text{CDCl}_3$ ):  $\delta$  143.11, 143.06, 143.00, 142.98, 142.94, 142.90, 138.79, 138.43, 138.35, 138.31, 137.70, 137.62, 137.52, 137.48, 137.46, 137.40, 137.38, 137.31, 137.30, 137.28, 137.26, 137.25, 137.21, 137.18, 137.14, 137.06, 137.03, 136.98, 136.93, 136.84, 136.82, 134.98, 134.96, 132.25, 132.08, 132.05, 132.03, 127.29, 127.26, 127.22, 127.20, 127.18, 127.12, 127.10, 127.09, 127.06, 126.99, 126.69, 126.66, 126.58, 126.54, 126.51, 126.50, 126.49, 0.04. HRMS (MALDI(P))  $m/z$  calcd for  $[\text{C}_{182}\text{H}_{194}\text{S}_{32}\text{Si}_{18}]$  3912.2085, found 3912.2082. IR (KBr): 2956, 2924, 2854 (C–H)  $\text{cm}^{-1}$ .

## 2. NMR and HRMS spectra

### NMR and HRMS spectra of COTh-3Br

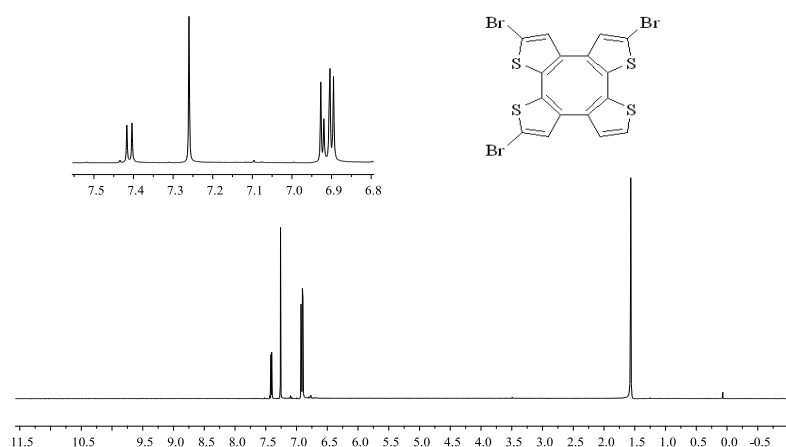

**Figure S1.**  $^1\text{H}$  NMR (400 MHz,  $\text{CDCl}_3$ ) spectra of COTh-3Br



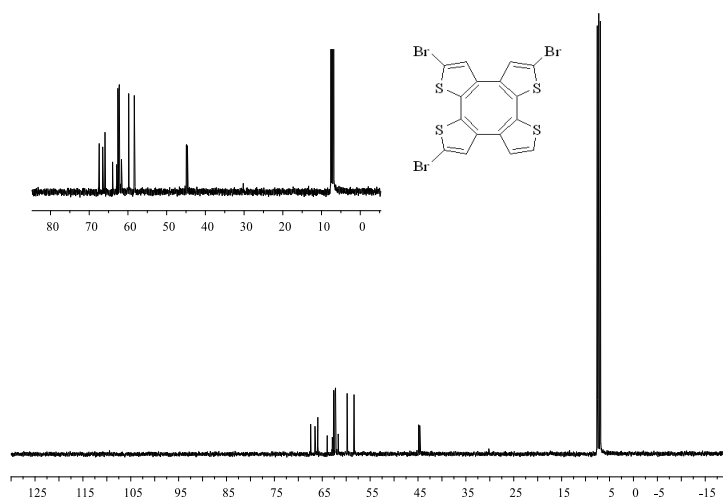

Figure S2.  $^{13}\text{C}$  NMR (100 MHz,  $\text{CDCl}_3$ ) spectra of COTh-3Br

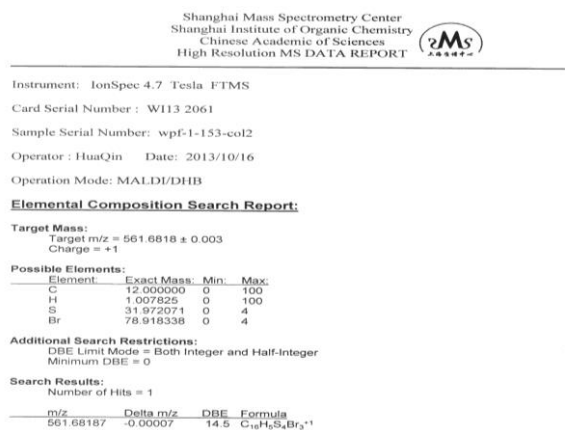

Figure S3. HRMS data of COTh-3Br

### NMR and HRMS spectra of COTh-B3TMS

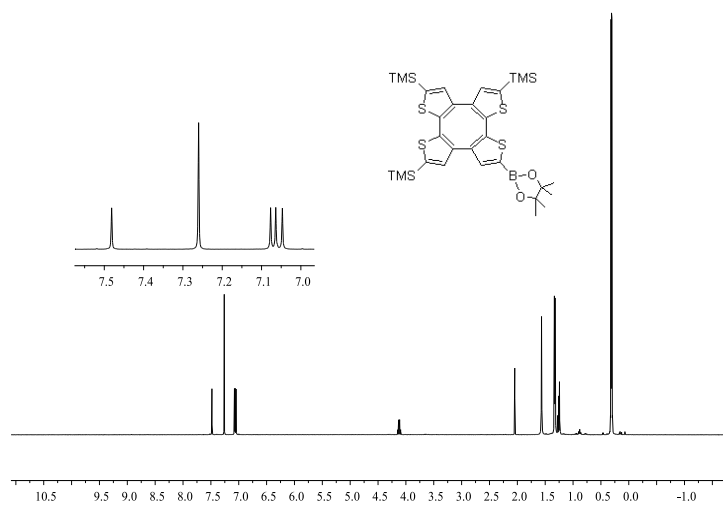

Figure S4.  $^1\text{H}$  NMR (400 MHz,  $\text{CDCl}_3$ ) spectra of COTh-B3TMS

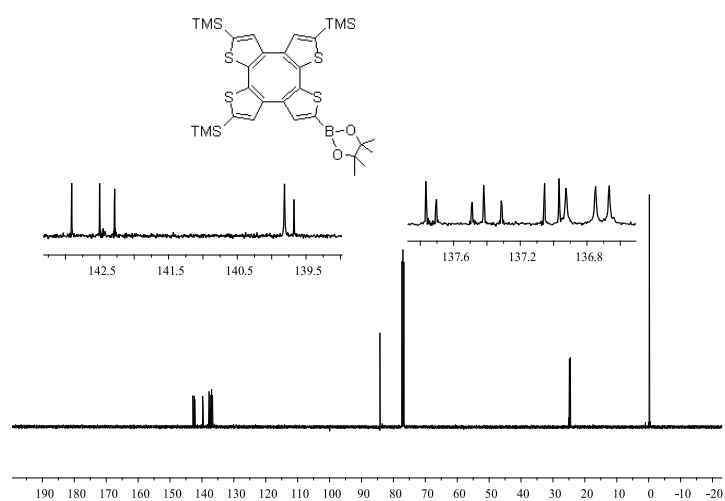

**Figure S5.**  $^{13}\text{C}$  NMR (100 MHz,  $\text{CDCl}_3$ ) spectra of **COTh-B3TMS**

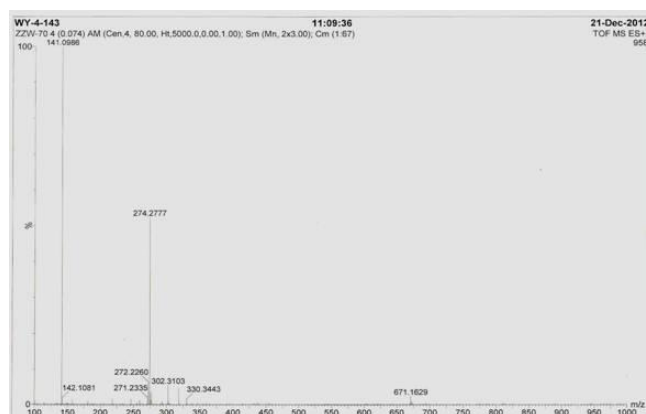

**Figure S6.** HRMS spectrum of **COTh-B3TMS**

### NMR and HRMS spectra of **2COTh**

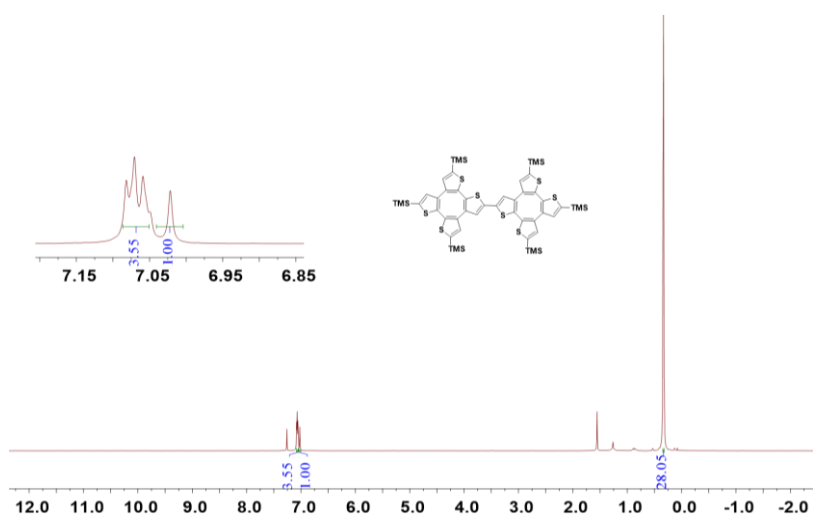

**Figure S7.**  $^1\text{H}$  NMR (400 MHz,  $\text{CDCl}_3$ ) spectra of **2COTh**

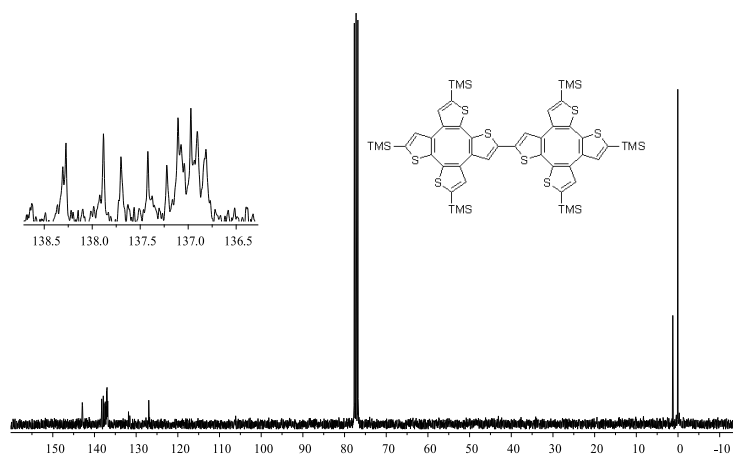

**Figure S8.**  $^{13}\text{C}$  NMR (75 MHz,  $\text{CDCl}_3$ ) spectra of **2COTh**

National Center for Organic Mass Spectrometry in Shanghai  
 Shanghai Institute of Organic Chemistry  
 Chinese Academic of Sciences  
 High Resolution MS DATA REPORT

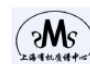

Instrument: Thermo Fisher Scientific LTQ FT Ultra

Card Serial Number : M151233

Sample Serial Number: WPF-3-197-COL2

Operator : HUAQIN Date: 2015/04/22

Operation Mode: DART Postive

Elemental composition search on mass 1087.13

| m/z       | Theo. Mass | Delta (ppm) | RDB equiv. | Composition                                       |
|-----------|------------|-------------|------------|---------------------------------------------------|
| 1087.1288 | 1087.1285  | 0.26        | 55.5       | $\text{C}_{70}\text{H}_{32}\text{S}_4\text{Si}_4$ |
|           | 1087.1272  | 1.52        | 30.5       | $\text{C}_{52}\text{H}_{56}\text{S}_7\text{Si}_6$ |
|           | 1087.1306  | -1.58       | 25.5       | $\text{C}_{50}\text{H}_{56}\text{S}_6\text{Si}_6$ |
|           | 1087.1319  | -2.84       | 50.5       | $\text{C}_{47}\text{H}_{44}\text{S}_4\text{Si}_4$ |
|           | 1087.1238  | 4.62        | 35.5       | $\text{C}_{56}\text{H}_{58}\text{S}_6\text{Si}_6$ |

**Figure S9.** HRMS data of **2COTh**

## NMR and HRMS spectra of **4COTh**

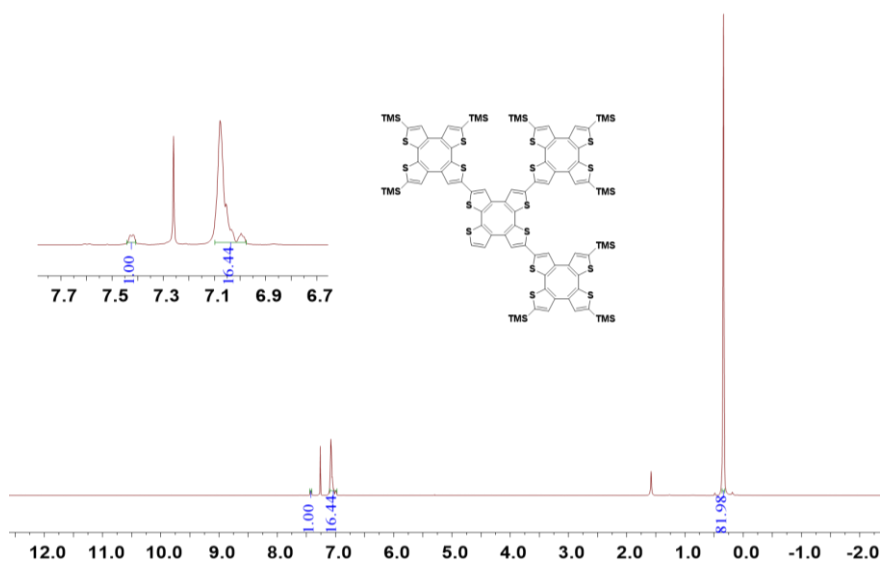

**Figure S10.**  $^1\text{H}$  NMR (400 MHz,  $\text{CDCl}_3$ ) spectra of **4COTh**

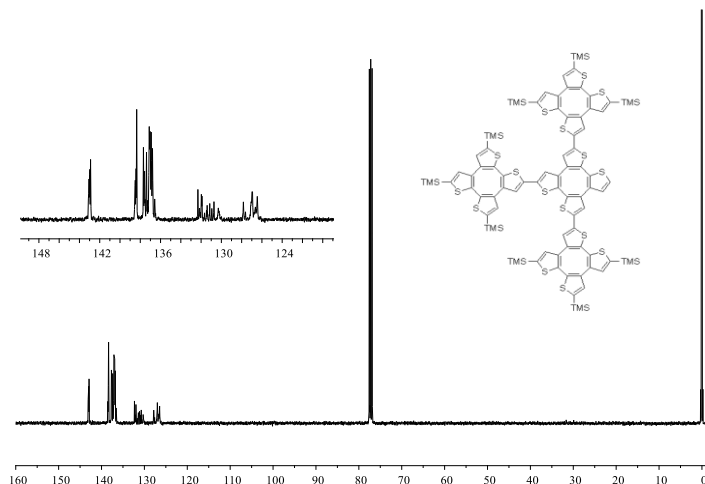

**Figure S11.**  $^{13}\text{C}$  NMR (100 MHz,  $\text{CDCl}_3$ ) spectra of **4COTh**

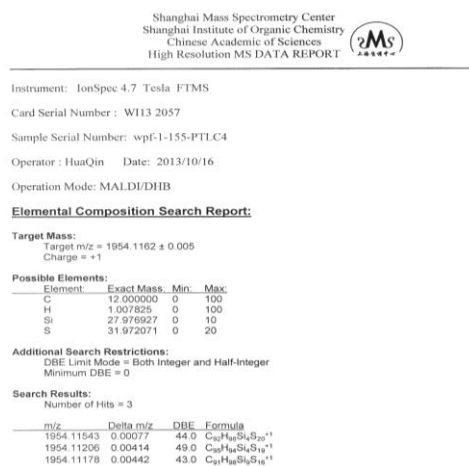

**Figure S12.** HRMS data of **4COTh**

### NMR and HRMS spectra of **8COTh**

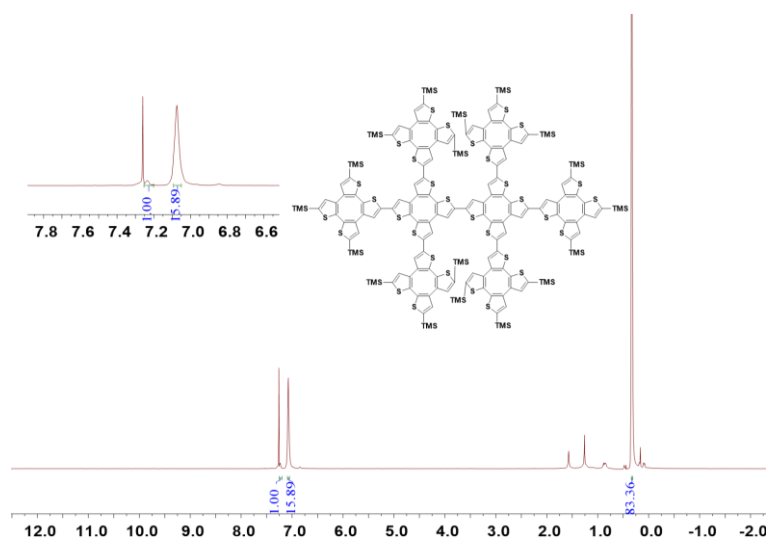

**Figure S13.**  $^1\text{H}$  NMR (400 MHz,  $\text{CDCl}_3$ ) spectra of **8COTh**

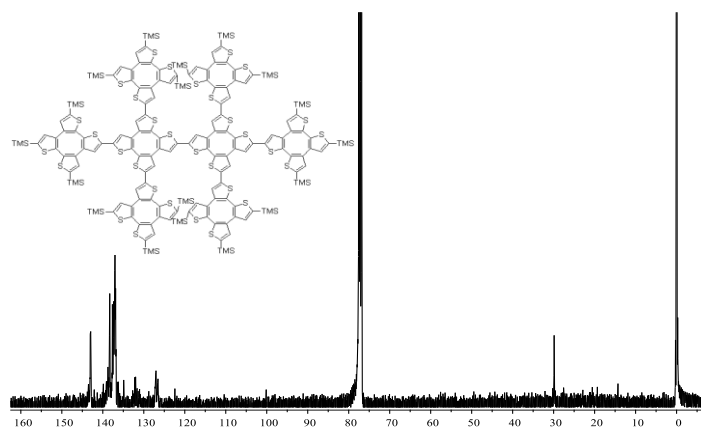

**Figure S14.**  $^{13}\text{C}$  NMR (100 MHz,  $\text{CDCl}_3$ ) spectrum of **8COTh** MALDI(P),20141117

| Analysis Info |                                                | Acquisition Date      |         |
|---------------|------------------------------------------------|-----------------------|---------|
| Analysis Name | D:\Data\MALDI\2014\1117\wpf-3-11_0_01_000005.d | 11/17/2014 2:35:37 PM |         |
| Method        | MALDI_P_100-3000                               | Operator              |         |
| Sample Name   |                                                | Instrument            | solarix |
| Comment       |                                                |                       |         |

  

| Acquisition Parameter |            |                       |                          |
|-----------------------|------------|-----------------------|--------------------------|
| Acquisition Mode      | Single MS  | Acquired Scans        | 10                       |
| Polarity              | Positive   | No. of Cell Fills     | 1                        |
| Broadband Low Mass    | 202.1 m/z  | No. of Laser Shots    | 25                       |
| Broadband High Mass   | 8000.0 m/z | Laser Power           | 20.2 lp                  |
| Source Accumulation   | 0.001 sec  | Laser Shot Frequency  | 0.020 sec                |
| Ion Accumulation Time | 0.300 sec  |                       |                          |
|                       |            | Calibration Date      | Thu Jun 26 09:51:13 2014 |
|                       |            | Data Acquisition Size | 1048576                  |
|                       |            | Data Processing Size  | 2097152                  |
|                       |            | Apodization           | Sine-Bell Multiplication |

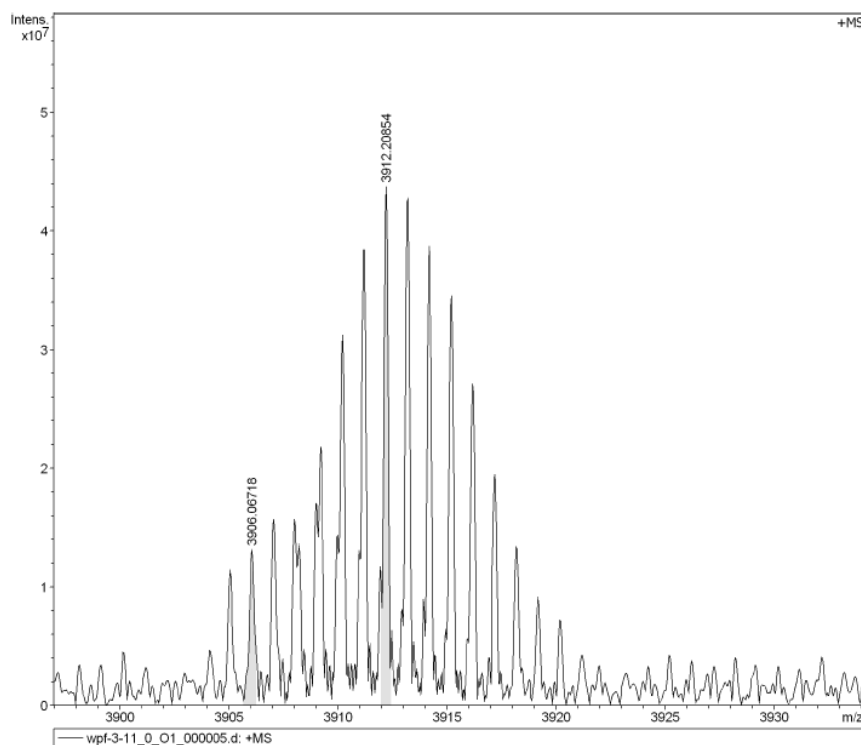

**Figure S15.** HRMS spectrum of **8COTh**

### 3. Theoretical calculation

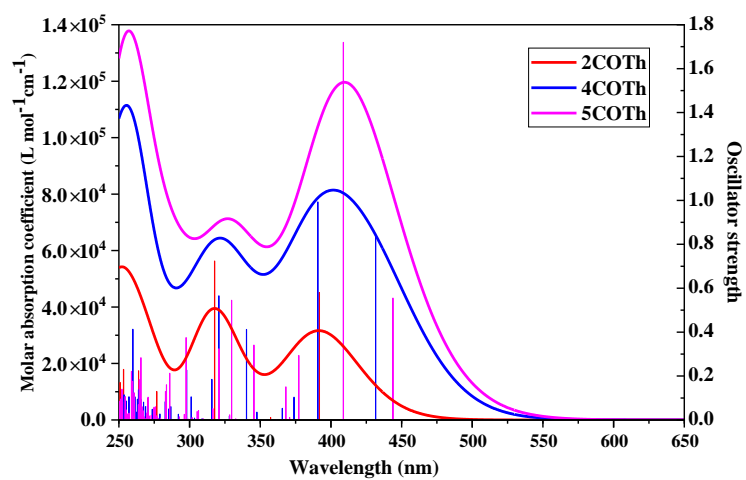

**Figure S16.** Simulated UV-Vis absorption spectra (curve) and oscillator strength (spikes) of the 2COTh, 4COTh and 5COTh.

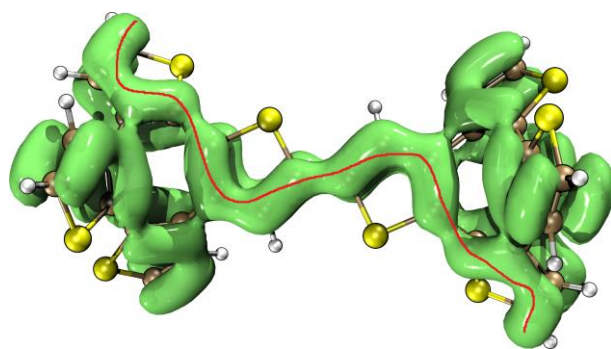

**2COTh**

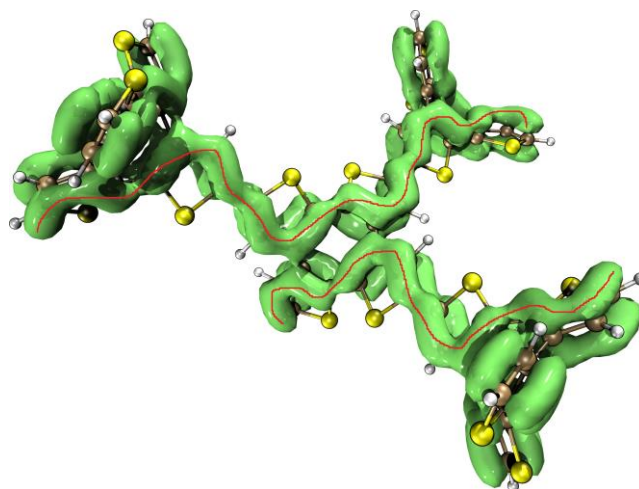

**4COTh**

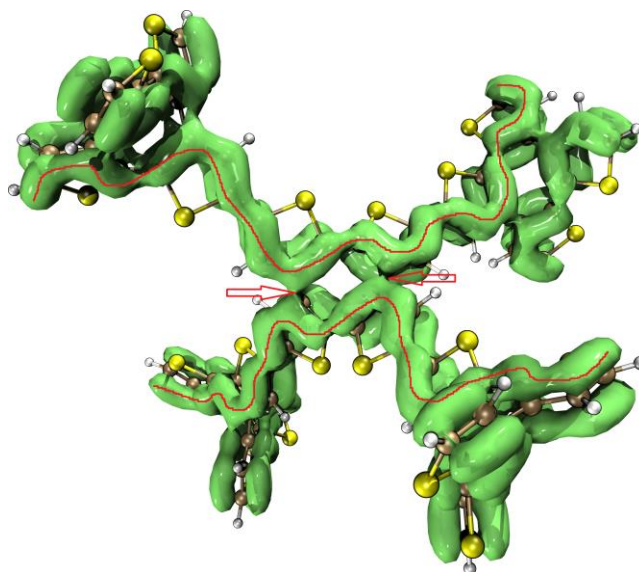

**5COTh**

**Figure S17.** Isosurfaces maps of LOL- $\pi$  of **2COTh**, **4COTh** and **5COTh**. The isovalues are set to 0.28 au.

#### 4. Fluorescence spectra of **2COTh**, **4COTh**, **5COTh** and **8COTh**

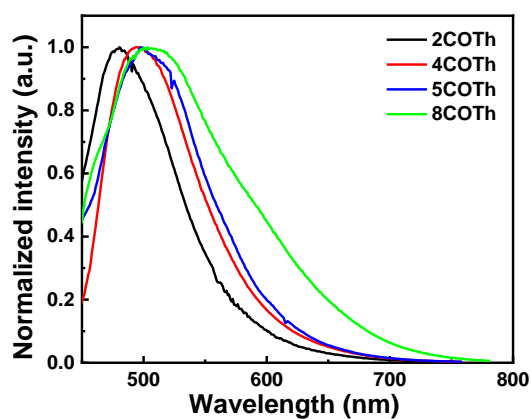

**Figure S18.** Fluorescence spectra of **2COTh**, **4COTh**, **5COTh** and **8COTh** in rigid state (77 K) in 2-MTHF ( $\lambda_{\text{ex}} = 410$  nm,  $[C] = 1\text{E-}5$  M).

#### 5. References

1. J. Suffert, Simple Direct Titration of Organolithium Reagents Using *N*-Pivaloyl-*o*-Toluidine and/or *N*-Pivaloyl-*o*-Benzylaniline, *J. Org. Chem.*, 1989, **54**, 509–510.

2. J. Tomasi, B. Mennucci and R. Cammi, Quantum Mechanical Continuum Solvation Models, *Chem. Rev.*, 2005, **105**, 2999–3094.
3. M. J. Frisch, G. W. Trucks, H. B. Schlegel, G. E. Scuseria, M. A. Robb, J. R. Cheeseman, G. Scalmani, V. Barone, B. Mennucci, G. A. Petersson, H. Nakatsuji, M. Caricato, X. Li, H. P. Hratchian, A. F. Izmaylov, J. Bloino, G. Zheng, J. L. Sonnenberg, M. Hada, M. Ehara, K. Toyota, R. Fukuda, J. Hasegawa, M. Ishida, T. Nakajima, Y. Honda, O. Kitao, H. Nakai, T. Vreven, J. A. Jr. Montgomery, J. E. Peralta, F. Ogliaro, M. Bearpark, J. J. Heyd, E. Brothers, K. N. Kudin, V. N. Staroverov, R. Kobayashi, J. Normand, K. Raghavachari, A. Rendell, J. C. Burant, S. S. Iyengar, J. Tomasi, M. Cossi, N. Rega, J. M. Millam, M. Klene, J. E. Knox, J. B. Cross, V. Bakken, C. Adamo, J. Jaramillo, R. Gomperts, R. E. Stratmann, O. Yazyev, A. J. Austin, R. Cammi, C. Pomelli, J. W. Ochterski, R. L. Martin, K. Morokuma, V.G. Zakrzewski, G. A. Voth, P. Salvador, J. J. Dannenberg, S. Dapprich, A. D. Daniels, O. Farkas, J. B. Foresman, J. V. Ortiz, J. Cioslowski and D. J. Fox, Gaussian 09. Wallingford CT: Gaussian, Inc., 2013.
4. P. Sherwood, A. H. DeVries, M. F. Guest, G. Schreckenbach, C. R. A. Catlow, S. A. French, A. A. Sokol, S. T. Bromley, W. Thiel, A. J. Turner, S. Billeter, F. Terstegen, S. Thiel, J. Kendrick, S. C. Rogers, J. Casci, M. Watson, F. King, E. Karlsen, M. Sjøvoll, A. Fahmi, A. Schäfer and C. Lennartz, QUASI: A General Purpose Implementation of the QM/MM Approach and its Application to Problems in Catalysis, *J. Mol. Struc-THEOCHEM.*, 2003, **632**, 1–28.
5. R. Ahlrichs, M. Bär, M. Häser, H. Horn and C. Kölmel, Electronic Structure Calculations on Workstation Computers: The Program System Turbomole, *Chem. Phys. Lett.*, 1989, **162**, 165–169.
6. TURBOMOLE V7.0 2015, a Development of University of Karlsruhe and Forschungszentrum Karlsruhe GmbH, 1989-2007, TURBOMOLE GmbH, since 2007; available from <http://www.turbomole.com>.
7. W. Smith and T. R. Forester, DL\_POLY\_2.0: A General-Purpose Parallel Molecular Dynamics Simulation Package, *J. Mol. Graph.*, 1996, **14**, 136–141.



8. J. Wang, R. M. Wolf, J. W. Caldwell, P. A. Kollman and D. A. Case, Development and Testing of a General Amber Force Field, *J. Comput. Chem.*, 2004, **25**, 1157–1174.
9. Z. Shuai, Thermal Vibration Correlation Function Formalism for Molecular Excited State Decay Rates, *Chin. J. Chem.*, 2020, **38**, 1223–1232.
10. Z. Shuai and Q. Peng, Excited States Structure and Processes: Understanding Organic Light-Emitting Diodes at the Molecular Level, *Phys. Rep.*, 2014, **537**, 123–156.
11. Z. Shuai and Q. Peng, Organic Light-Emitting Diodes: Theoretical Understanding of Highly Efficient Materials and Development of Computational Methodology, *Nat. Sci. Rev.*, 2017, **4**, 224–239.
12. T. Lu and F. Chen, Multiwfn: A Multifunctional Wavefunction Analyzer, *J. Comput. Chem.*, 2012, **33**, 580–592.
13. W. Humphrey, A. Dalke and K. Schulten, VMD: Visual Molecular Dynamics, *J. Mol. Graph.*, 1996, **14**, 33–38.
14. H. L. Schmider and A. D. Becke, Chemical Content of the Kinetic Energy Density, *J. Mol. Struct-THEOCHEM.*, 2000, **527**, 51–61.
15. T. Lu and Q. Chen, A Simple Method of Identifying  $\pi$  Orbitals for Non-planar Systems and a Protocol of Studying  $\pi$  Electronic Structure, *Theor. Chem. Acc.*, 2020, **139**, 25.
16. Y. Wang, D. Gao, J. Shi, Y. Kan, J. Song, C. Li and H. Wang, Derivation of Saddle Shaped Cyclooctatetrathiophene: Increasing Conjugation and Fabricating Pentamer, *Tetrahedron.*, 2014, **70**, 631–636.
